# Supplementary material for: The effect of terminal substituents on the electronic properties of rod-shaped [HGaNH]n oligomers
Source: Royal Society of Chemistry journal article supplement (doi:10.1039/c6cp02576e), 2016-01-01
Supplement: c6cp02576e1.pdf [file c6cp02576e1.pdf]

Formal reactions of “capping” of open oligomers with different thermal groups could be written in the following way.

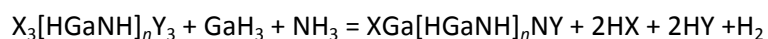

**Table S1** Standard enthalpies  $\Delta H_{298}^0$  (in kcal/mol) of the formal reactions of “capping” oligomers with XGa and NY groups.

| X   | Y   | <i>n</i> =9 | <i>n</i> =30 |
|-----|-----|-------------|--------------|
| H   | H   | -26.24      | -51.56       |
| H   | CH3 | -74.36      | -99.60       |
| H   | F   | -150.12     | -179.96      |
| H   | CF3 | -62.81      | -93.75       |
| CH3 | H   | -49.54      | -75.76       |
| CH3 | CH3 | -97.70      | -123.80      |
| CH3 | F   | -173.09     | -204.32      |
| CH3 | CF3 | -85.63      | -118.05      |
| F   | H   | 34.10       | 13.30        |
| F   | CH3 | -14.00      | -34.75       |
| F   | F   | -91.22      | -115.13      |
| F   | CF3 | -4.27       | -28.62       |
| CF3 | H   | -37.68      | -57.34       |
| CF3 | CH3 | -85.79      | -105.64      |
| CF3 | F   | -163.04     | -186.03      |
| CF3 | CF3 | -76.20      | -99.80       |

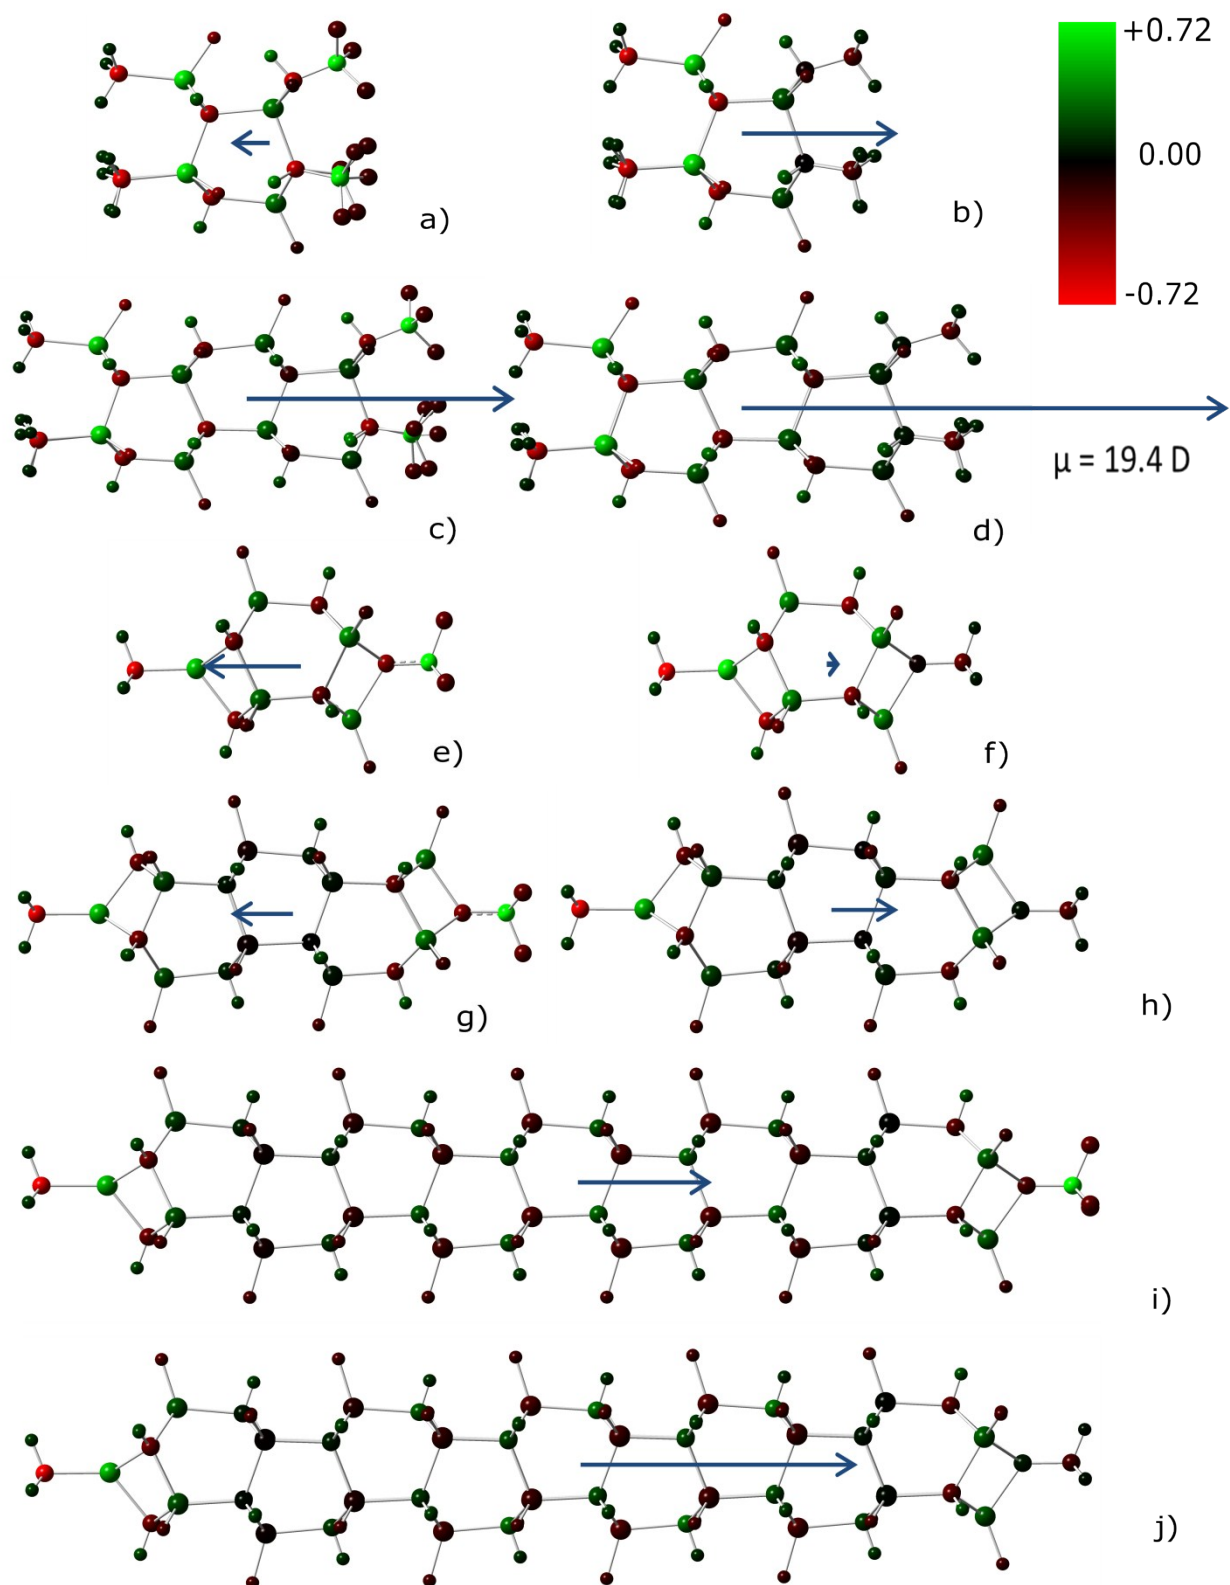

**Figure S1** Dipole moment vectors and ECP charge distribution over atoms of oligomers:  $(\text{CH}_3)_3[\text{HGaNH}]_6(\text{CF}_3)_3$  (a),  $(\text{CH}_3)_3[\text{HGaNH}]_6(\text{CH}_3)_3$  (b),  $(\text{CH}_3)_3[\text{HGaNH}]_{12}(\text{CF}_3)_3$  (c),  $(\text{CH}_3)_3[\text{HGaNH}]_{12}(\text{CH}_3)_3$  (d),  $\text{CH}_3\text{Ga}[\text{HGaNH}]_6\text{NCF}_3$  (e),  $\text{CH}_3\text{Ga}[\text{HGaNH}]_6\text{NCH}_3$  (f),  $\text{CH}_3\text{Ga}[\text{HGaNH}]_{12}\text{NCF}_3$  (g),  $\text{CH}_3\text{Ga}[\text{HGaNH}]_{12}\text{NCH}_3$  (h),  $\text{CH}_3\text{Ga}[\text{HGaNH}]_{12}\text{NCF}_3$  (i),  $\text{CH}_3\text{Ga}[\text{HGaNH}]_{12}\text{NCH}_3$  (j)

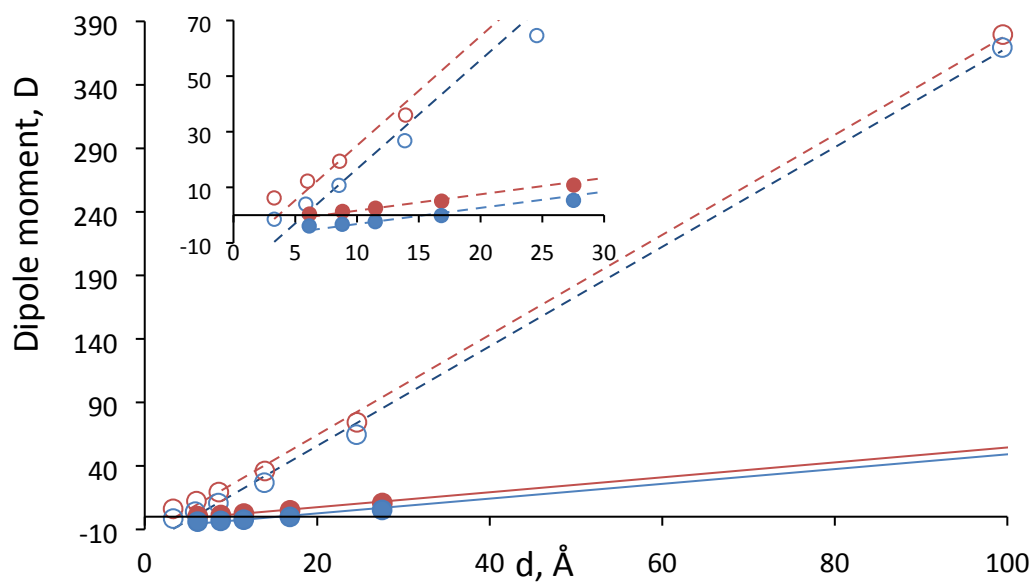

**Figure S2** Dipole moments as functions of the lengths of oligomers  $(\text{CH}_3)_3[\text{HGaNH}]_n(\text{CH}_3)_3$  (red open circles),  $(\text{CH}_3)_3[\text{HGaNH}]_n(\text{CF}_3)_3$  (blue open circles),  $\text{CH}_3\text{Ga}[\text{HGaNH}]_n\text{NCH}_3$  (red filled circles),  $\text{CH}_3\text{Ga}[\text{HGaNH}]_n\text{NCF}_3$  (blue filled circles) with  $n=6, 9, 12, 18, 30, 114$ . Lines are linear approximation. Lengths are defined as distances between Ga and N atoms/planes at opposite ends of the oligomer.

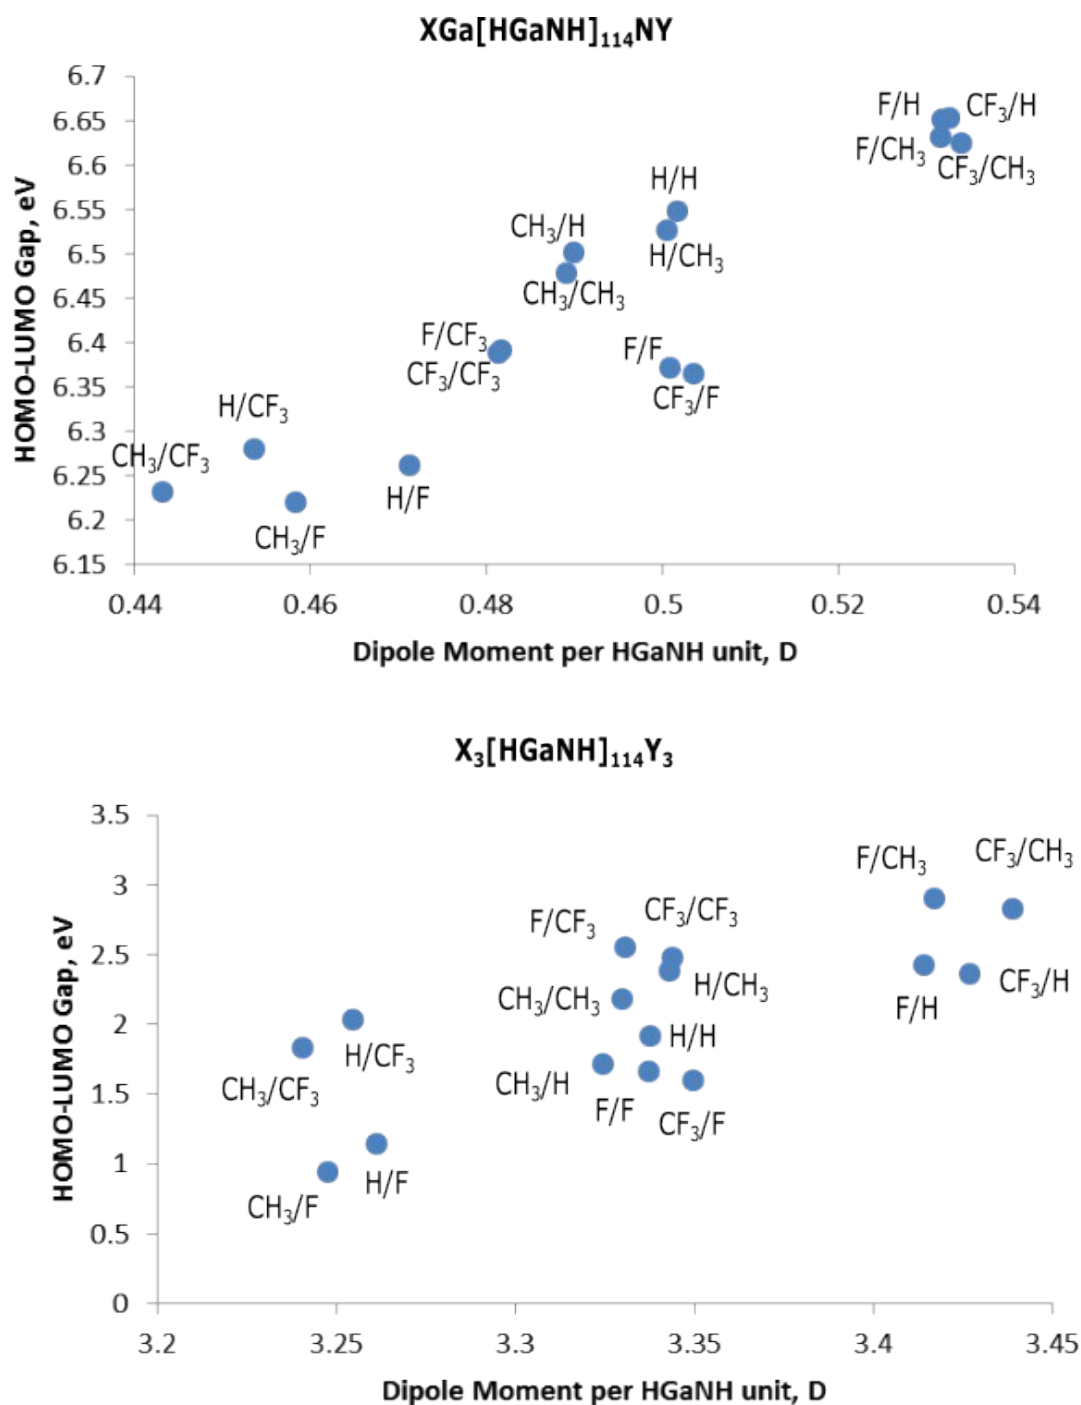

**Figure S3** HOMO-LUMO gaps of the XGa[HGaNH]<sub>114</sub>NY and X<sub>3</sub>[HGaNH]<sub>114</sub>Y<sub>3</sub> oligomers with respect of their dipole moment values calculated per HGaNH unit. Tooltips for the particular oligomers are written in X/Y format.

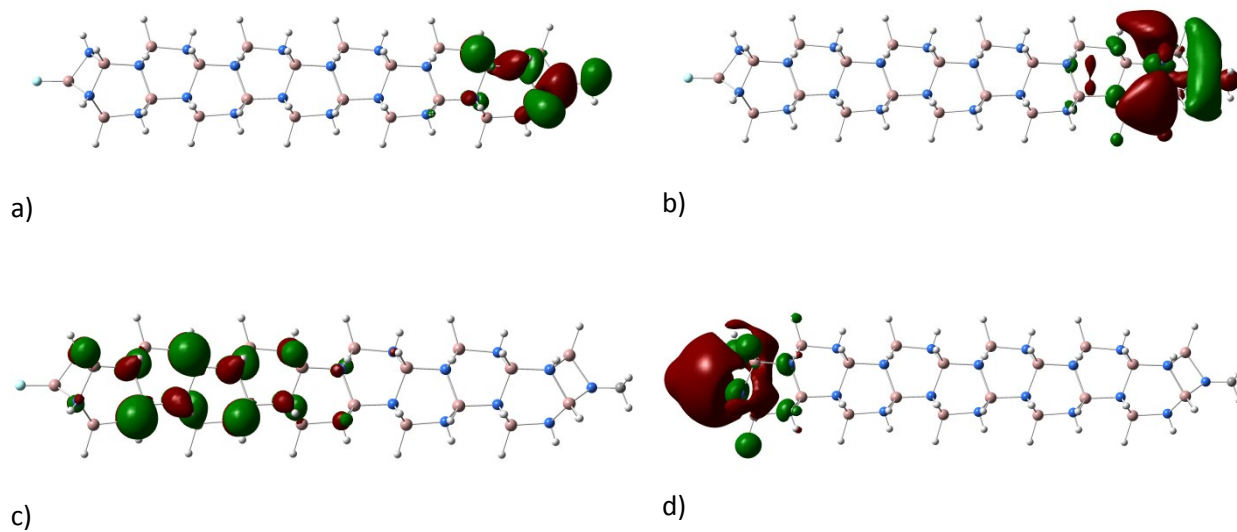

**Figure S4** HOMO (a), LUMO(b) , HOMO-2(c) and LUMO+3 of FGa(HGaNH<sub>30</sub>)NCH<sub>3</sub> oligomer. Relatively to the HOMO energy, LUMO has energy 6.6 eV , LUMO has 6.8 eV and HOMO-2 has energy -0.1 eV. Blue color refers to N, pink to Ga, white to H, gray to C and light blue to F atoms.
